# Supplementary material for: Whole-Exome Sequencing and Targeted Copy Number Analysis in Primary Ciliary Dyskinesia
Source: PubMed Central journal article supplement (PMC4528333; doi:10.1534/g3.115.019851), 2015-07-02
Supplement: supp_g3.115.019851_019851SI.pdf [file supp_g3.115.019851_019851SI.pdf]

## WHOLE EXOME SEQUENCING AND TARGETED COPY NUMBER ANALYSIS IN PRIMARY CILIARY DYSKINESIA

Christian R Marshall<sup>\*§</sup>, Stephen W Scherer<sup>§,†</sup>, Maimoona A Zariwala<sup>‡</sup>, Lynette Lau<sup>\*</sup>, Tara A Paton<sup>§</sup>, Tracy Stockley<sup>\*</sup>, Rebekah K Jobling<sup>\*\*</sup>, Peter N Ray<sup>\*</sup>, Michael R Knowles<sup>§§</sup>, FORGE Canada Consortium, GDMCC consortium, David A Hall<sup>††,‡‡,\*\*\*\*</sup>, Sharon D Dell<sup>\*\*\*,§§,†††,‡‡‡</sup> and Raymond H Kim<sup>\*\*,,†††, ‡‡‡</sup>.

<sup>\*</sup>Department of Pediatric Laboratory Medicine, The Hospital for Sick Children, Toronto, ON, Canada

<sup>§</sup>The Centre for Applied Genomics, Genetics and Genome Biology, The Hospital for Sick Children, Toronto, ON, Canada

<sup>†</sup>Department of Molecular Genetics and the McLaughlin Centre, University of Toronto, Toronto, ON, Canada

<sup>‡</sup>Department of Pathology and Laboratory Medicine, University of North Carolina School of Medicine, Chapel Hill, NC, USA

<sup>\*\*</sup>Division of Clinical and Metabolic Genetics, The Hospital for Sick Children, Toronto, ON, Canada

<sup>§§</sup>Department of Medicine, University of North Carolina School of Medicine, Chapel Hill, NC, USA

<sup>††</sup>Division of Respiriology, St. Michael's Hospital, Toronto, ON, Canada

<sup>‡‡</sup>Department of Medicine, University of Toronto, Toronto, ON, Canada

<sup>\*\*\*</sup>Child Health Evaluative Sciences, The Hospital for Sick Children, ON, Canada

<sup>§§§</sup>Division of Respiratory Medicine, The Hospital for Sick Children, ON, Canada

<sup>†††</sup>Department of Pediatrics, University of Toronto, Toronto, ON, Canada

**‡‡‡These authors jointly directed this work, correspondence should be addressed to:**

Raymond H Kim, MD/PhD, FRCPC, FCCMG, FACMG  
Division of Metabolic and Clinical Genetics, The Hospital for Sick Children,  
555 University Ave, Toronto, ON, M5G 1X8.  
Phone: 416-813-5338  
Fax: 416-813-5345  
[raymond.kim@utoronto.ca](mailto:raymond.kim@utoronto.ca)

Sharon D. Dell, Beng, MD, FRCPC  
Division of Respiratory Medicine, Room 4543, The Hospital for Sick Children,  
555 University Ave, Toronto, ON, M5G 1X8.  
Phone: 416-813-6248  
Fax: 416-813-6246  
[sharon.dell@sickkids.ca](mailto:sharon.dell@sickkids.ca)

David A. Hall MD PhD FRCPC  
Division of Respiriology, St Michael's Hospital,  
30 Bond Street, Toronto, ON, M5B 1W8  
Phone: 416-846-6060 x 5516  
Fax: 416-846-5649  
[hallda@smh.ca](mailto:hallda@smh.ca)

## File S1

### Supplemental Material and Methods

#### Sanger sequencing

PCR primers targeting the variant region were designed using Primer3 on genomic DNA sequence masked for annotated SNPs. (Table S1). 50ng of genomic DNA for each sample was amplified and Sanger sequenced at the Hospital for Sick Children Molecular diagnostic lab, a CLIA-CAP certified laboratory, on a 3730XL DNA Analyzer (Life Technologies). For HYDIN, locus specific primers were designed (Table S2) and sequence was blatted to ensure only the chromosome 16 locus was amplified (Figure S1).

#### Copy Number Estimation of *DYX1C1* with Taqman copy number assay

Copy number estimation of exon 7 of *DYX1C1* was performed using the Taqman copy number probes Hs02618794\_cn (chr.15:55,727,217), Hs05342683\_cn (chr.15:55,729,606), and Hs02608276\_cn (chr.15:55,731,727) (Life Technologies) using the manufacturer's recommended protocol. The assay was performed in quadruplicate on 10ng genomic DNA for each sample in a 96-well plate. The 10 µl reaction mix consisted of 2µl 2x Taqman Genotyping Master Mix (Life Technologies), 0.5 µl of 20X copy number assay, 0.5 µl TaqMan RNase P Copy Number Reference Assay (Life Technologies, part 4403326), 2 µl water and 2 µl of 5ng/µl genomic DNA. Cycling conditions for the reaction were 95°C for 10 min, followed by 40 cycles of 95°C for 15 sec and 60°C for 1 min. Samples were analyzed using the ViiA™ 7 Real-Time PCR System (Life Technologies) and analyzed using CopyCaller Software (Life Technologies, PN 4412907).

**Table S1 Pathogenic mutations identified through other studies**

| Family | Patient | Ethnicity | Sex | nNO<br>nL/min | Ciliary EM | Gene           | Exon | Base Changes   | Predicted Effect | Segregation    |
|--------|---------|-----------|-----|---------------|------------|----------------|------|----------------|------------------|----------------|
| 118    | 35      | Pakistani | F   | 23.4          | ODA+IDA    | <i>LRRC6</i>   | 5    | c.630delG      | p.W210Cfs*12 (2) | Unknown        |
| 118    | 37      | Pakistani | M   | 36.5          | Not done   | <i>LRRC6</i>   | 5    | c.630delG      | p.W210Cfs*12 (2) | Unknown        |
| 110    | 15      | Pakistani | F   | 10.8          | ODA+IDA    | <i>CCDC103</i> | 3    | c.461A>C       | p.H154P (6)      | Mother carrier |
| 117    | 17      | Somali    | M   | 107.2         | ODA+IDA    | <i>SPAG1</i>   | 12   | c.2542delG     | p.D848I*fs10 (4) | Unknown        |
| 117    | 19      | Somali    | M   | 8.8           | ODA+IDA    | <i>SPAG1</i>   | 18   | c.2542delG     | p.D848I*fs10 (4) | Unknown        |
| 119    | 18      | White     | F   | 1.0           | ODA+IDA    | <i>SPAG1</i>   | 9    | c.897_901del   | p.K301* (4)      | Paternal       |
|        |         |           |     |               |            |                | 16   | c.1993_1996del | p.L665* (4)      | Maternal       |

nNo, nasal nitric oxide; F, female; M, male; Mo, months; ODA, outer dynein arms; IDA, inner dynein arms. Further clinical characteristics previously described (Kim et al. 2014). (2) (Zariwala et al. 2013); (4) (Knowles et al. 2013); (6) (Panizzi et al. 2012).

**Table S2 Primers sequences for Sanger validation**

| Gene           | Exon/Intron | Forward Primer            | Reverse Primer             |
|----------------|-------------|---------------------------|----------------------------|
| <i>LRRC6</i>   | Ex 5        | GGGCTGATTCACACTGCTAC      | CAGAATTGTCACAAGCAATGG      |
| <i>SPAG1</i>   | Ex 12       | GAGTTCTGCATGATCAGTCTGC    | GAATTAGGGCGGTAGCAGTG       |
| <i>ZMYND10</i> | Ex 1        | GAGAACTGACGCTCCCAAC       | CCCGACTCAAGGACAATGAC       |
|                | Ex 3        | GGGATATCAGGGTTGAGCTG      | AGAGAAGGACAGGGCCTGAG       |
| <i>RSPH1</i>   | Ex 2        | TCTAGCCCAGGCGTTGTTAC      | TGTCAGTATTCACAGACAAGTTCAG  |
|                | Ex 4        | CACAACACATCTGCCTTTGC      | ACTTGCACAGAAAGGCATCC       |
| <i>ARMC4</i>   | Ex 3        | AATGATCCTCCCACCCTTTC      | CTAGGCTTGCTGGTAAGTTTGAG    |
|                | Ex 18       | TCACAGCTGTATTGTTACTTTCTGC | AATCCAGGTTTCTGGACTGC       |
| <i>CCNO</i>    | Ex 3        | TCCTGAAGCCTTCTCTGTGG      | CTGCACAAGCTGCACTTCAC       |
| <i>HYDIN</i>   | Ex 32       | GACAGTACTGATGGGTTTCTTGA   | GGAGTTAACGTTGTTTCTAGTCTCCA |
|                | Int 79      | GCAGCAGCTACTAACCTCTTTTACC | AGGGAGGTGAACCTCAGCCT       |
| <i>DNAAF3</i>  | Ex 12       | CTTCTCATCCCTGAGCTTGG      | CCTCTGAGAGTGAACCTGGAG      |
| <i>DYX1C1</i>  | Ex 8        | GATTCAGTGCAGGCAACGTTT     | GCAATATAGCGAGACCCACT       |

**Table S3 Patients with no mutations in PCD genes through WES**

| Family | Patient | Sex | nNO<br>nL/min | Ciliary EM   | Situs<br>Status | Ethnicity  |
|--------|---------|-----|---------------|--------------|-----------------|------------|
| 121    | 30      | M   | 15.3          | IDA+CP       | S               | Portuguese |
| 133    | 25      | M   | 13.8          | Normal       | S               | White      |
| 131    | 20      | M   | 99.2          | Inconclusive | I               | White      |
| 139    | 48      | F   | 56.2          | Inconclusive | S               | Pakistani  |
| 143    | 53      | F   | 18.4          | Inconclusive | S               | White      |

nNo, nasal nitric oxide; F, female; M, male; Yr, years; S, situs solitus; I, situs inversus; IDA, inner dynein arms; CP, central pair; inconclusive=adequate sample inconclusive TEM

A. chr16: 70,866,971 C>A (c.13680-1G>T)

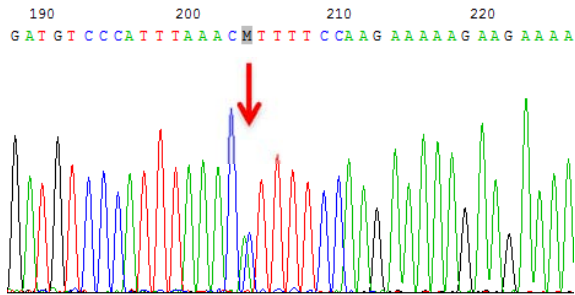

>chr16:70866736-70867075 (340bp)

GCAGCAGCTACTAACCTCTTTTACCgcaggtggtcccacgcagactccagacagggtagactcagagga  
ctgcctccttgatgtagcagagaatgtttttacaaaggctctcctttcccacctcgggtaggtagg  
tcacttcaaagaacccatgcctgaggaatataccttcttctgggctaataaggagaaatgaggctc  
aaatTTTTgatgtcccattttaaacttttccaaga<sup>a</sup>aaagaaga<sup>a</sup>aagaaagagagtttatggatgttg  
taagggtgtcctcaatgctactgagaacaagagactgcct<sup>A</sup>GGCTGAGGTTACCTCCCT

B. chr16:71,008,480 delA (c.4866del; p.P1623Qfs\*20)

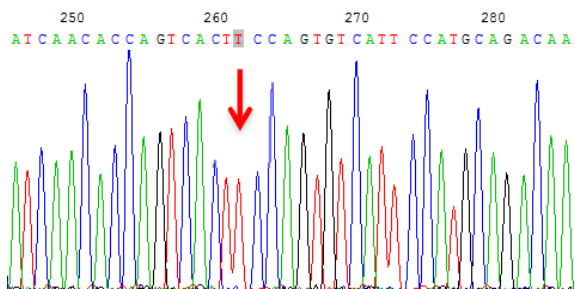

>chr16:71008367-71008741 (375bp)

GACAGTACTGATGGGTTCTTG<sup>A</sup>gagaaatgaccaagtgcaataggaagggtctccccagcctgggtac  
ctgtctcatgaaggacacgcttgtctgcatggaatgacactgga<sup>a</sup>aagtgactgggtgttgatgatcttgat  
gatgtgggttcggacttcgccaaggatgatgtagccaaagtccaggatgtactctggtagctggattctg  
aaatggttaatagacctactagtcactttcaaacctggaaggctacttttccaaaagtgagtgagctcg  
atTTTTTTTTctacctcctgtgcacagttttattctccagagtgagagaacaacaatggctacc<sup>T</sup>  
GGAGACTAGAAACAACGTTAACTCC

**Figure S1** Sanger sequencing of *HYDIN* variants c.13680-1G>T (A) and c.4866del; p.P1623Qfs\*20 (B) with chromatogram and *in silico* PCR sequence. Red Arrow depicts variant in the Sanger chromatogram and variant position is highlighted red in the amplicon sequence below. Capital letters are the locus specific primers (Table S2) and variants highlighted in yellow depict nucleotide sequence specific to chromosome 16.
