# Supplementary material for: Whole-Exome Sequencing and Targeted Copy Number Analysis in Primary Ciliary Dyskinesia
Source: PubMed Central journal article supplement (PMC4528333; doi:10.1534/g3.115.019851), 2015-07-02
Supplement: supp_g3.115.019851_TableS1.pdf [file supp_g3.115.019851_TableS1.pdf]

**Table S1 Pathogenic mutations identified through other studies**

| Family | Patient | Ethnicity | Sex | nNO<br>nL/min | Ciliary EM | Gene           | Exon | Base Changes   | Predicted Effect | Segregation    |
|--------|---------|-----------|-----|---------------|------------|----------------|------|----------------|------------------|----------------|
| 118    | 35      | Pakistani | F   | 23.4          | ODA+IDA    | <i>LRRC6</i>   | 5    | c.630delG      | p.W210Cfs*12 (2) | Unknown        |
| 118    | 37      | Pakistani | M   | 36.5          | Not done   | <i>LRRC6</i>   | 5    | c.630delG      | p.W210Cfs*12 (2) | Unknown        |
| 110    | 15      | Pakistani | F   | 10.8          | ODA+IDA    | <i>CCDC103</i> | 3    | c.461A>C       | p.H154P (6)      | Mother carrier |
| 117    | 17      | Somali    | M   | 107.2         | ODA+IDA    | <i>SPAG1</i>   | 12   | c.2542delG     | p.D848I*fs10 (4) | Unknown        |
| 117    | 19      | Somali    | M   | 8.8           | ODA+IDA    | <i>SPAG1</i>   | 18   | c.2542delG     | p.D848I*fs10 (4) | Unknown        |
| 119    | 18      | White     | F   | 1.0           | ODA+IDA    | <i>SPAG1</i>   | 9    | c.897_901del   | p.K301* (4)      | Paternal       |
|        |         |           |     |               |            |                | 16   | c.1993_1996del | p.L665* (4)      | Maternal       |

nNo, nasal nitric oxide; F, female; M, male; Mo, months; ODA, outer dynein arms; IDA, inner dynein arms. Further clinical characteristics previously described (Kim et al. 2014). (2) (Zariwala et al. 2013); (4) (Knowles et al. 2013); (6) (Panizzi et al. 2012).
