# Supplementary material for: Whole-Exome Sequencing and Targeted Copy Number Analysis in Primary Ciliary Dyskinesia
Source: PubMed Central journal article supplement (PMC4528333; doi:10.1534/g3.115.019851), 2015-07-02
Supplement: supp_g3.115.019851_TableS2.pdf [file supp_g3.115.019851_TableS2.pdf]

**Table S2 Primers sequences for Sanger validation**

| Gene           | Exon/Intron | Forward Primer            | Reverse Primer             |
|----------------|-------------|---------------------------|----------------------------|
| <i>LRRC6</i>   | Ex 5        | GGGCTGATTCACACTGCTAC      | CAGAATTGTCACAAGCAATGG      |
| <i>SPAG1</i>   | Ex 12       | GAGTTCTGCATGATCAGTCTGC    | GAATTAGGGCGGTAGCAGTG       |
| <i>ZMYND10</i> | Ex 1        | GAGAACTGACGCTCCCAAC       | CCCGACTCAAGGACAATGAC       |
|                | Ex 3        | GGGATATCAGGGTTGAGCTG      | AGAGAAGGACAGGGCCTGAG       |
| <i>RSPH1</i>   | Ex 2        | TCTAGCCCAGGCGTTGTTAC      | TGTCAGTATTCACAGACAAGTTCAG  |
|                | Ex 4        | CACAACACATCTGCCTTTGC      | ACTTGCACAGAAAGGCATCC       |
| <i>ARMC4</i>   | Ex 3        | AATGATCCTCCCACCCTTTC      | CTAGGCTTGCTGGTAAGTTTGAG    |
|                | Ex 18       | TCACAGCTGTATTGTTACTTTCTGC | AATCCAGGTTTCTGGACTGC       |
| <i>CCNO</i>    | Ex 3        | TCCTGAAGCCTTCTCTGTGG      | CTGCACAAGCTGCACTTCAC       |
| <i>HYDIN</i>   | Ex 32       | GACAGTACTGATGGGTTTCTTGA   | GGAGTTAACGTTGTTTCTAGTCTCCA |
|                | Int 79      | GCAGCAGCTACTAACCTCTTTTACC | AGGGAGGTGAACCTCAGCCT       |
| <i>DNAAF3</i>  | Ex 12       | CTTCTCATCCCTGAGCTTGG      | CCTCTGAGAGTGAACCTGGAG      |
| <i>DYX1C1</i>  | Ex 8        | GATTCAGTGCAGGCAACGTTT     | GCAATATAGCGAGACCCACT       |
