# Supplementary material for: Whole-Exome Sequencing and Targeted Copy Number Analysis in Primary Ciliary Dyskinesia
Source: PubMed Central journal article supplement (PMC4528333; doi:10.1534/g3.115.019851), 2015-07-02
Supplement: supp_g3.115.019851_TableS3.pdf [file supp_g3.115.019851_TableS3.pdf]

**Table S3 Patients with no mutations in PCD genes through WES**

| Family | Patient | Sex | nNO<br>nL/min | Ciliary EM   | Situs<br>Status | Ethnicity  |
|--------|---------|-----|---------------|--------------|-----------------|------------|
| 121    | 30      | M   | 15.3          | IDA+CP       | S               | Portuguese |
| 133    | 25      | M   | 13.8          | Normal       | S               | White      |
| 131    | 20      | M   | 99.2          | Inconclusive | I               | White      |
| 139    | 48      | F   | 56.2          | Inconclusive | S               | Pakistani  |
| 143    | 53      | F   | 18.4          | Inconclusive | S               | White      |

nNo, nasal nitric oxide; F, female; M, male; Yr, years; S, situs solitus; I, situs inversus; IDA, inner dynein arms; CP, central pair; inconclusive=adequate sample inconclusive TEM
